# Supplementary material for: Sustainable polar aprotic/poly-deep eutectic solvent systems for highly efficient dissolution of lignin
Source: Royal Society of Chemistry journal article supplement (doi:10.1039/d3gc00733b), 2023-01-01
Supplement: d3gc00733b1.pdf [file d3gc00733b1.pdf]

## Sustainable polar aprotic/poly-deep eutectic solvent systems for highly efficient dissolution of lignin

Qiaoling Liu,<sup>a,†</sup> Yang Wang,<sup>a,†</sup> Jing Bian,<sup>a</sup> Ming-Fei Li,<sup>a</sup> Jun-Li Ren,<sup>b</sup> Xiang Hao,<sup>a,\*</sup>  
and Feng Peng<sup>a,\*</sup>

<sup>a</sup> Beijing Key Laboratory of Lignocellulosic Chemistry, MOE Engineering Research Center of Forestry Biomass Materials and Energy, Beijing Forestry University, Beijing 100083, China

<sup>b</sup> State Key Laboratory of Pulp and Paper Engineering, South China University of Technology, Guangzhou 510640, China

|                                                                                                                                                                                                                                                                           |    |
|---------------------------------------------------------------------------------------------------------------------------------------------------------------------------------------------------------------------------------------------------------------------------|----|
| 1. Table S1. The viscosity and density of PDESs at room temperature.                                                                                                                                                                                                      | 1  |
| 2. Fig. S1. The phase-transition temperatures of PDESs.                                                                                                                                                                                                                   | 1  |
| 3. Fig. S2. Solubility of lignin in PDESs                                                                                                                                                                                                                                 | 1  |
| 4. Table S2. The lignin solubility in the pure PDESs and polar aprotic solvents at room temperature.                                                                                                                                                                      | 2  |
| 5. Table S3. The viscosity of PDESs with different co-solvents at room temperature.                                                                                                                                                                                       | 2  |
| 6. Table S4. Solubility of EHL in the synthesized PDESs with different co-solvents at room temperature.                                                                                                                                                                   | 2  |
| 7. Table S5. Solubility of LS in the synthesized PDESs with different co-solvents at room temperature.                                                                                                                                                                    | 3  |
| 8. Table S6. Solubility of OL in the synthesized PDESs with different co-solvents at room temperature.                                                                                                                                                                    | 4  |
| 9. Fig. S3. 2D HSQC NMR spectra of the three lignin samples, including the side chain regions and the aromatic regions. Main substructures of lignin, including side chain linkages and aromatic units.                                                                   | 5  |
| 10. Table S7. Assignments of <sup>13</sup> C- <sup>1</sup> H correlated signals in the HSQC spectra of three lignin samples.                                                                                                                                              | 5  |
| 11. Table S8. The Kamlet-Taft empirical parameters of solvent.                                                                                                                                                                                                            | 6  |
| 12. Table S9. The Kamlet-Taft empirical parameters of the PC/PDESs. <sup>a</sup>                                                                                                                                                                                          | 6  |
| 13. Table S10. The Kamlet-Taft empirical parameters of the NFM/PDESs. <sup>a</sup>                                                                                                                                                                                        | 7  |
| 14. Table S11. The Kamlet-Taft empirical parameters of the DMI/PDESs. <sup>a</sup>                                                                                                                                                                                        | 8  |
| 15. Table S12. The Kamlet-Taft empirical parameters of the Cyrene/PDESs. <sup>a</sup>                                                                                                                                                                                     | 9  |
| 16. Fig. S4. The correlation between the LS solubility and the $\alpha$ value of the corresponding solvent (the line represents the solubility of the lignin in PDESs, and the data above the line indicated that lignin was promoted to dissolve by adding co-solvents). | 10 |

|     |                                                                                                                                                                                                                                                                                                                                                                                                                                  |    |
|-----|----------------------------------------------------------------------------------------------------------------------------------------------------------------------------------------------------------------------------------------------------------------------------------------------------------------------------------------------------------------------------------------------------------------------------------|----|
| 17. | Fig. S5. The correlation between the OL solubility and the $\alpha$ value of the corresponding solvent (the line represents the solubility of the lignin in PDESs, and the data above the line indicated that lignin was promoted to dissolve by adding co-solvents).                                                                                                                                                            | 10 |
| 18. | Fig. S6. The correlation between the EHL solubility and the $\beta$ value of the corresponding solvent (the line represents the solubility of the lignin in PDESs, and the data above the line indicated that lignin was promoted to dissolve by adding co-solvents).                                                                                                                                                            | 11 |
| 19. | Fig. S7. The correlation between the LS solubility and the $\beta$ value of the corresponding solvent (the line represents the solubility of the lignin in PDESs, and the data above the line indicated that lignin was promoted to dissolve by adding co-solvents).                                                                                                                                                             | 11 |
| 20. | Fig. S8. The correlation between the OL solubility and the $\beta$ value of the corresponding solvent (the line represents the solubility of the lignin in PDESs, and the data above the line indicated that lignin was promoted to dissolve by adding co-solvents).                                                                                                                                                             | 12 |
| 21. | Fig. S9. The correlation between the EHL solubility and the $\alpha$ value of the corresponding solvent (the line represents the solubility of the lignin in PDESs, and the data above the line indicated that lignin was promoted to dissolve by adding co-solvents).                                                                                                                                                           | 12 |
| 22. | Fig. S10. The correlation between the EHL solubility and the $\pi^*$ value of the corresponding solvent (the line represents the solubility of the lignin in PDESs, and the data above the line indicated that lignin was promoted to dissolve by adding co-solvents, and the critical value of $\pi^*$ was 0.441, 0.452, 0.587, 0.520, 0.418 and 0.554 in P2-Lev, P4-Lev, P6-Lev, PA2-Lev, PA4-Lev, and PA6-Lev, respectively). | 13 |
| 23. | Fig. S11. The correlation between the OL solubility and the $\pi^*$ value of the corresponding solvent (the line represents the solubility of the lignin in PDESs, and the data above the line indicated that lignin was promoted to dissolve by adding co-solvents, and the critical value of $\pi^*$ was 0.441, 0.452, 0.531, 0.441, 0.418 and 0.406 in P2-Lev, P4-Lev, P6-Lev, PA2-Lev, PA4-Lev, and PA6-Lev, respectively).  | 13 |
| 24. | Fig. S12. SEM images of a), b) and c) initial LS and d), e) and f) regenerated LS.                                                                                                                                                                                                                                                                                                                                               | 14 |
| 25. | Fig. S13. SEM images of a), b) and c) initial OL and d), e) and f) regenerated OL.                                                                                                                                                                                                                                                                                                                                               | 14 |
| 26. | Fig. S14. SEM images of a), b) and c) initial EHL and d), e) and f) regenerated EHL.                                                                                                                                                                                                                                                                                                                                             | 14 |
| 27. | Fig. S15. The FT-IR of native and generated lignins                                                                                                                                                                                                                                                                                                                                                                              | 15 |
| 28. | Fig. S16. TGA of initial and regenerated lignin                                                                                                                                                                                                                                                                                                                                                                                  | 15 |
| 29. | Table S13. Sugar content and molecular weight of three lignin samples.                                                                                                                                                                                                                                                                                                                                                           | 15 |
| 30. | Table S14. Element analysis of different lignin                                                                                                                                                                                                                                                                                                                                                                                  | 16 |

Table S1. The viscosity and density of PDESs at room temperature.

| Entry | PDES    | Viscosity (mPa·s) | Density (g/cm <sup>3</sup> ) |
|-------|---------|-------------------|------------------------------|
| 1     | P2-Lev  | 51.20             | 1.1338                       |
| 2     | P4-Lev  | 94.72             | 1.1331                       |
| 3     | P6-Lev  | 133.26            | 1.1314                       |
| 4     | PA2-Lev | 29.40             | 1.1280                       |
| 5     | PA4-Lev | 58.84             | 1.1278                       |
| 6     | PA6-Lev | 96.90             | 1.1271                       |

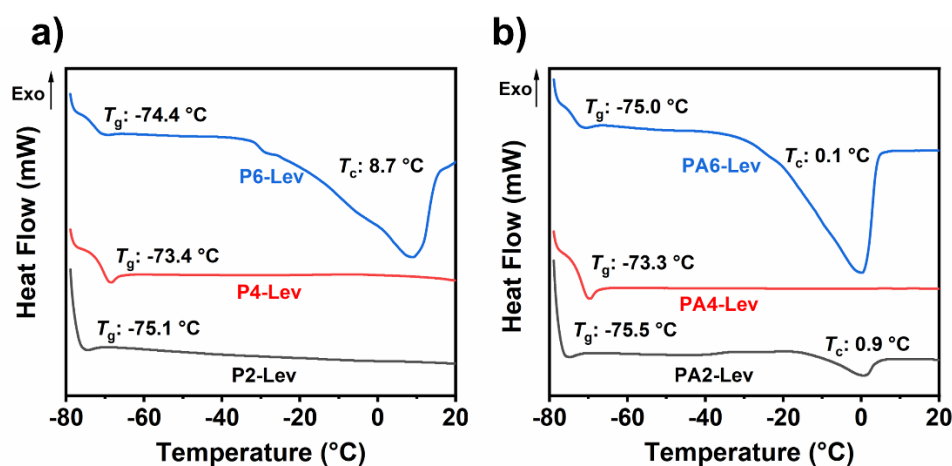

Fig. S1. The phase-transition temperatures of PDESs.

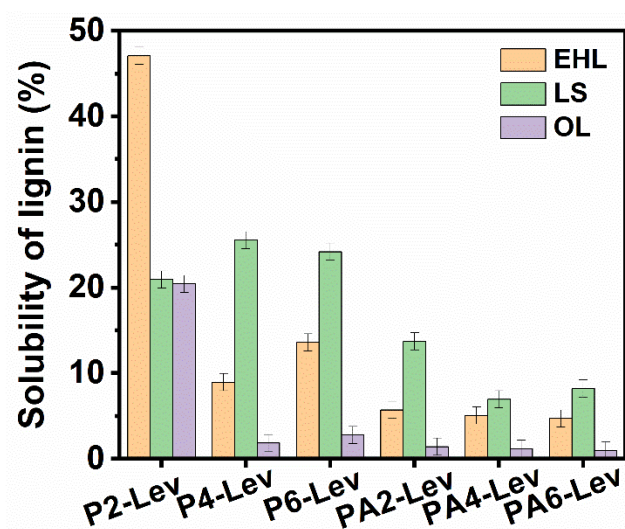

Fig. S2. Solubility of lignin in PDESs

Table S2. The lignin solubility in the pure PDESs and polar aprotic solvents at room temperature.

| Entry | Solvent | Solubility (%)      |                     |                     |
|-------|---------|---------------------|---------------------|---------------------|
|       |         | EHL                 | OL                  | LS                  |
| 1     | P2-Lev  | 47.06 ( $\pm 1.2$ ) | 20.41 ( $\pm 1.2$ ) | 20.94 ( $\pm 1.2$ ) |
| 2     | P4-Lev  | 8.94 ( $\pm 0.1$ )  | 1.82 ( $\pm 0.1$ )  | 25.52 ( $\pm 0.2$ ) |
| 3     | P6-Lev  | 13.5 ( $\pm 0.4$ )  | 2.76 ( $\pm 0.1$ )  | 24.17 ( $\pm 0.5$ ) |
| 4     | PA2-Lev | 5.71 ( $\pm 0.4$ )  | 1.41 ( $\pm 0.5$ )  | 13.70 ( $\pm 1.0$ ) |
| 5     | PA4-Lev | 5.06 ( $\pm 0.5$ )  | 1.17 ( $\pm 0.2$ )  | 6.94 ( $\pm 0.5$ )  |
| 6     | PA6-Lev | 4.71 ( $\pm 0.1$ )  | 0.94 ( $\pm 0.1$ )  | 8.20 ( $\pm 0.4$ )  |
| 7     | PC      | 0.76 ( $\pm 0.1$ )  | 0.82 ( $\pm 0.1$ )  | 0.59 ( $\pm 0.1$ )  |
| 8     | NFM     | 0.58 ( $\pm 0.1$ )  | 0.96 ( $\pm 0.1$ )  | 0.59 ( $\pm 0.1$ )  |
| 9     | DMI     | 1.29 ( $\pm 0.1$ )  | 0.59 ( $\pm 0.1$ )  | 0.59 ( $\pm 0.1$ )  |
| 10    | Cyrene  | 0.58 ( $\pm 0.1$ )  | 1.47 ( $\pm 0.1$ )  | 0.59 ( $\pm 0.1$ )  |

<sup>a</sup>The solubility value was the average of twice measurements, and the values in the parentheses were the half of the range of replicate results.

Table S3. The viscosity of PDESs with different co-solvents at room temperature.

| Entry | PDES   | Co-solvent (20 vol%) | Viscosity (mPa·s) |
|-------|--------|----------------------|-------------------|
| 1     | P6-Lev | DMI                  | 87.58             |
| 2     |        | PC                   | 54.40             |
| 3     |        | NFM                  | 86.86             |
| 4     |        | Cyrene               | 106.58            |

Table S4. Solubility of EHL in the synthesized PDESs with different co-solvents at room temperature.

| Entry | PDES    | Co-solvent content (vol%) | Solubility of EHL (%) <sup>a</sup> |                     |                     |                     |
|-------|---------|---------------------------|------------------------------------|---------------------|---------------------|---------------------|
|       |         |                           | PC                                 | NFM                 | DMI                 | Cyrene              |
| 1     | P2-Lev  | 10                        | 62.00 ( $\pm 1.7$ )                | 63.12 ( $\pm 1.5$ ) | 70.00 ( $\pm 1.7$ ) | 12.01 ( $\pm 1.5$ ) |
| 2     |         | 20                        | 72.47 ( $\pm 1.8$ )                | 73.17 ( $\pm 1.2$ ) | 80.23 ( $\pm 1.7$ ) | 24.64 ( $\pm 1.2$ ) |
| 3     |         | 40                        | 72.52 ( $\pm 1.5$ )                | 76.47 ( $\pm 1.7$ ) | 67.35 ( $\pm 1.4$ ) | 24.23 ( $\pm 0.6$ ) |
| 4     |         | 60                        | 60.41 ( $\pm 1.7$ )                | 76.17 ( $\pm 1.2$ ) | 60.47 ( $\pm 1.7$ ) | 13.23 ( $\pm 1.2$ ) |
| 5     |         | 80                        | 54.29 ( $\pm 1.1$ )                | 69.47 ( $\pm 1.7$ ) | 55.35 ( $\pm 0.7$ ) | 7.71 ( $\pm 0.6$ )  |
| 6     | P4-Lev  | 10                        | 35.75 ( $\pm 1.7$ )                | 30.14 ( $\pm 1.6$ ) | 28.79 ( $\pm 1.5$ ) | 10.44 ( $\pm 1.6$ ) |
| 7     |         | 20                        | 55.76 ( $\pm 1.7$ )                | 47.17 ( $\pm 1.7$ ) | 43.82 ( $\pm 1.0$ ) | 15.47 ( $\pm 1.0$ ) |
| 8     |         | 40                        | 43.17 ( $\pm 1.1$ )                | 37.47 ( $\pm 1.1$ ) | 33.88 ( $\pm 1.0$ ) | 14.23 ( $\pm 0.5$ ) |
| 9     |         | 60                        | 37.35 ( $\pm 1.1$ )                | 30.11 ( $\pm 1.0$ ) | 27.11 ( $\pm 0.5$ ) | 8.12 ( $\pm 1.0$ )  |
| 10    |         | 80                        | 25.41 ( $\pm 0.5$ )                | 21.29 ( $\pm 0.6$ ) | 17.17 ( $\pm 0.5$ ) | 6.24 ( $\pm 0.5$ )  |
| 11    | P6-Lev  | 10                        | 17.29 ( $\pm 0.5$ )                | 10.58 ( $\pm 0.4$ ) | 11.64 ( $\pm 0.6$ ) | 12.8 ( $\pm 0.5$ )  |
| 12    |         | 20                        | 25.29 ( $\pm 0.5$ )                | 11.58 ( $\pm 0.7$ ) | 12.64 ( $\pm 0.6$ ) | 13.47 ( $\pm 0.5$ ) |
| 13    |         | 40                        | 19.23 ( $\pm 0.5$ )                | 9.76 ( $\pm 0.7$ )  | 9.12 ( $\pm 0.7$ )  | 12.47 ( $\pm 0.5$ ) |
| 14    |         | 60                        | 13.38 ( $\pm 0.6$ )                | 6.71 ( $\pm 0.6$ )  | 5.06 ( $\pm 0.6$ )  | 7.88 ( $\pm 0.6$ )  |
| 15    |         | 80                        | 9.12 ( $\pm 0.5$ )                 | 3.35 ( $\pm 0.5$ )  | 2.35 ( $\pm 0.5$ )  | 4.00 ( $\pm 0.5$ )  |
| 16    | PA2-Lev | 10                        | 17.7 ( $\pm 0.4$ )                 | 8.141 ( $\pm 0.5$ ) | 6.92 ( $\pm 0.5$ )  | 6.03 ( $\pm 0.4$ )  |
| 17    |         | 20                        | 24.70 ( $\pm 0.4$ )                | 10.41 ( $\pm 0.5$ ) | 9.82 ( $\pm 0.5$ )  | 8.53 ( $\pm 0.3$ )  |

|    |         |    |                     |                     |                     |                     |
|----|---------|----|---------------------|---------------------|---------------------|---------------------|
| 18 |         | 40 | 21.29 ( $\pm 0.6$ ) | 8.00 ( $\pm 0.6$ )  | 7.59 ( $\pm 0.6$ )  | 8.18 ( $\pm 0.6$ )  |
| 19 |         | 60 | 18.94 ( $\pm 0.4$ ) | 4.76 ( $\pm 0.4$ )  | 5.75 ( $\pm 0.4$ )  | 7.71 ( $\pm 0.4$ )  |
| 20 |         | 80 | 17.11 ( $\pm 0.6$ ) | 2.41 ( $\pm 0.3$ )  | 2.53 ( $\pm 0.3$ )  | 2.29 ( $\pm 0.3$ )  |
| 21 |         | 10 | 28.21 ( $\pm 0.5$ ) | 9.70 ( $\pm 1.1$ )  | 15.01 ( $\pm 0.8$ ) | 8.75 ( $\pm 0.5$ )  |
| 22 |         | 20 | 32.47 ( $\pm 1.0$ ) | 11.52 ( $\pm 1.0$ ) | 19.05 ( $\pm 0.8$ ) | 13.52 ( $\pm 0.5$ ) |
| 23 | PA4-Lev | 40 | 21.35 ( $\pm 0.8$ ) | 10.41 ( $\pm 0.5$ ) | 14.00 ( $\pm 0.5$ ) | 6.47 ( $\pm 0.6$ )  |
| 24 |         | 60 | 9.41 ( $\pm 0.5$ )  | 7.12 ( $\pm 0.5$ )  | 9.94 ( $\pm 0.4$ )  | 4.67 ( $\pm 0.5$ )  |
| 25 |         | 80 | 7.12 ( $\pm 0.5$ )  | 5.941 ( $\pm 0.4$ ) | 7.82 ( $\pm 0.5$ )  | 2.18 ( $\pm 0.4$ )  |
| 26 |         | 10 | 20.55 ( $\pm 0.6$ ) | 5.23 ( $\pm 0.5$ )  | 3.75 ( $\pm 0.4$ )  | 5.1 ( $\pm 0.3$ )   |
| 27 |         | 20 | 26.94 ( $\pm 0.5$ ) | 7.53 ( $\pm 0.4$ )  | 4.12 ( $\pm 0.4$ )  | 5.59 ( $\pm 0.4$ )  |
| 28 | PA6-Lev | 40 | 23.17 ( $\pm 0.8$ ) | 4.12 ( $\pm 0.4$ )  | 2.24 ( $\pm 0.3$ )  | 5.16 ( $\pm 0.4$ )  |
| 29 |         | 60 | 20.17 ( $\pm 0.5$ ) | 2.12 ( $\pm 0.5$ )  | 2.00 ( $\pm 0.6$ )  | 4.24 ( $\pm 0.5$ )  |
| 30 |         | 80 | 15.11 ( $\pm 0.2$ ) | 1.29 ( $\pm 0.3$ )  | 1.71 ( $\pm 0.5$ )  | 1.88 ( $\pm 0.3$ )  |

<sup>a</sup>The solubility value was the average of twice measurements, and the values in the parentheses were the half of the range of replicate results

Table S5. Solubility of LS in the synthesized PDESs with different co-solvents at room temperature.

| Entry | PDES    | Co-solvent content (vol%) | Solubility of LS (%) <sup>a</sup> |                     |                     |                     |
|-------|---------|---------------------------|-----------------------------------|---------------------|---------------------|---------------------|
|       |         |                           | PC                                | NFM                 | DMI                 | Cyrene              |
| 1     |         | 10                        | 82.45 ( $\pm 1.6$ )               | 68.89 ( $\pm 1.4$ ) | 78.83 ( $\pm 1.5$ ) | 38.20 ( $\pm 1.7$ ) |
| 2     |         | 20                        | 92.52 ( $\pm 1.7$ )               | 78.94 ( $\pm 1.7$ ) | 96.82 ( $\pm 1.7$ ) | 48.23 ( $\pm 1.1$ ) |
| 3     | P2-Lev  | 40                        | 60.52 ( $\pm 1.7$ )               | 56.05 ( $\pm 1.1$ ) | 63.00 ( $\pm 1.7$ ) | 45.82 ( $\pm 1.1$ ) |
| 4     |         | 60                        | 54.23 ( $\pm 1.1$ )               | 36.17 ( $\pm 0.8$ ) | 54.94 ( $\pm 1.1$ ) | 29.35 ( $\pm 1$ )   |
| 5     |         | 80                        | 48.35 ( $\pm 1$ )                 | 21.17 ( $\pm 0.8$ ) | 46.47 ( $\pm 1.1$ ) | 11.52 ( $\pm 1.1$ ) |
| 6     |         | 10                        | 42.31 ( $\pm 1.4$ )               | 42.60 ( $\pm 1.6$ ) | 47.8 ( $\pm 1.6$ )  | 31.8 ( $\pm 1.7$ )  |
| 7     |         | 20                        | 54.35 ( $\pm 1.7$ )               | 53.64 ( $\pm 1.7$ ) | 59.82 ( $\pm 1.1$ ) | 40.82 ( $\pm 1.7$ ) |
| 8     | P4-Lev  | 40                        | 44.64 ( $\pm 1.1$ )               | 44.64 ( $\pm 1.1$ ) | 51.82 ( $\pm 1.7$ ) | 34.76 ( $\pm 1.7$ ) |
| 9     |         | 60                        | 31.71 ( $\pm 1.1$ )               | 33.88 ( $\pm 1.1$ ) | 41.05 ( $\pm 1.7$ ) | 18.71 ( $\pm 1.1$ ) |
| 10    |         | 80                        | 26.17 ( $\pm 0.5$ )               | 18.00 ( $\pm 1.1$ ) | 20.11 ( $\pm 1.1$ ) | 8.18 ( $\pm 0.5$ )  |
| 11    |         | 10                        | 25.13 ( $\pm 1.0$ )               | 20.15 ( $\pm 0.6$ ) | 20.23 ( $\pm 1.2$ ) | 30.12 ( $\pm 1.1$ ) |
| 12    |         | 20                        | 31.82 ( $\pm 1.7$ )               | 24.14 ( $\pm 1.1$ ) | 23.82 ( $\pm 0.5$ ) | 33.35 ( $\pm 1.7$ ) |
| 13    | P6-Lev  | 40                        | 24.71 ( $\pm 1.2$ )               | 22.52 ( $\pm 1.2$ ) | 17.64 ( $\pm 1.2$ ) | 22.35 ( $\pm 1.0$ ) |
| 14    |         | 60                        | 15.82 ( $\pm 1.2$ )               | 14.94 ( $\pm 1.2$ ) | 12.52 ( $\pm 1.0$ ) | 14.17 ( $\pm 1.1$ ) |
| 15    |         | 80                        | 9.18 ( $\pm 0.5$ )                | 7.35 ( $\pm 0.5$ )  | 4.529 ( $\pm 0.5$ ) | 6.59 ( $\pm 0.5$ )  |
| 16    |         | 10                        | 44.2 ( $\pm 2.0$ )                | 25.23 ( $\pm 2.0$ ) | 30.1 ( $\pm 1.8$ )  | 30.1 ( $\pm 2.0$ )  |
| 17    |         | 20                        | 52.47 ( $\pm 2.0$ )               | 35.47 ( $\pm 1.8$ ) | 41.76 ( $\pm 2.0$ ) | 37.64 ( $\pm 2.0$ ) |
| 18    | PA2-Lev | 40                        | 48.11 ( $\pm 1.2$ )               | 31.05 ( $\pm 1.2$ ) | 29.41 ( $\pm 1.0$ ) | 36.05 ( $\pm 1.4$ ) |
| 19    |         | 60                        | 35.52 ( $\pm 1.0$ )               | 15.88 ( $\pm 1.4$ ) | 14.64 ( $\pm 1.2$ ) | 27.23 ( $\pm 1.0$ ) |
| 20    |         | 80                        | 29.82 ( $\pm 1.0$ )               | 10.82 ( $\pm 1.0$ ) | 4.24 ( $\pm 1.0$ )  | 13.88 ( $\pm 1.0$ ) |
| 21    |         | 10                        | 22.2 ( $\pm 1.2$ )                | 16.87 ( $\pm 1.2$ ) | 23.60 ( $\pm 1.1$ ) | 33.40 ( $\pm 1.0$ ) |
| 22    |         | 20                        | 26.58 ( $\pm 1.2$ )               | 20.88 ( $\pm 1.2$ ) | 29.41 ( $\pm 1.2$ ) | 34.94 ( $\pm 0.7$ ) |
| 23    | PA4-Lev | 40                        | 16.29 ( $\pm 1.0$ )               | 19.41 ( $\pm 0.6$ ) | 16.52 ( $\pm 1.1$ ) | 25.41 ( $\pm 1.1$ ) |
| 24    |         | 60                        | 9.88 ( $\pm 0.6$ )                | 12.05 ( $\pm 0.5$ ) | 12.94 ( $\pm 0.5$ ) | 16.71 ( $\pm 0.5$ ) |
| 25    |         | 80                        | 7.05 ( $\pm 0.5$ )                | 7.24 ( $\pm 0.5$ )  | 9.41 ( $\pm 0.6$ )  | 7.50 ( $\pm 0.5$ )  |

|    |         |    |                     |                     |                     |                     |
|----|---------|----|---------------------|---------------------|---------------------|---------------------|
| 26 |         | 10 | 16.21 ( $\pm 0.4$ ) | 10.99 ( $\pm 0.6$ ) | 9.76 ( $\pm 0.6$ )  | 20.12 ( $\pm 0.5$ ) |
| 27 |         | 20 | 19.00 ( $\pm 0.4$ ) | 13.94 ( $\pm 0.6$ ) | 12.11 ( $\pm 0.6$ ) | 23.41 ( $\pm 0.5$ ) |
| 28 | PA6-Lev | 40 | 16.88 ( $\pm 0.4$ ) | 13.23 ( $\pm 0.4$ ) | 9.65 ( $\pm 0.5$ )  | 18.35 ( $\pm 0.4$ ) |
| 29 |         | 60 | 12.17 ( $\pm 0.3$ ) | 8.29 ( $\pm 0.3$ )  | 7.71 ( $\pm 0.3$ )  | 12.88 ( $\pm 0.3$ ) |
| 30 |         | 80 | 9.05 ( $\pm 0.3$ )  | 5.88 ( $\pm 0.3$ )  | 5.24 ( $\pm 0.3$ )  | 5.06 ( $\pm 0.3$ )  |

<sup>a</sup>The solubility value was the average of twice measurements, and the values in the parentheses were the half of the range of replicate results

Table S6. Solubility of OL in the synthesized PDESs with different co-solvents at room temperature.

| Entry | PDES    | Co-solvent content (vol%) | Solubility of OL (%) <sup>a</sup> |                     |                     |                     |
|-------|---------|---------------------------|-----------------------------------|---------------------|---------------------|---------------------|
|       |         |                           | PC                                | NFM                 | DMI                 | Cyrene              |
| 1     |         | 10                        | 46.34 ( $\pm 1.4$ )               | 48.76 ( $\pm 1.6$ ) | 42.71 ( $\pm 1.6$ ) | 4.01 ( $\pm 1.7$ )  |
| 2     |         | 20                        | 56.41 ( $\pm 1.7$ )               | 61.76 ( $\pm 1.7$ ) | 52.70 ( $\pm 1.6$ ) | 4.41 ( $\pm 1.1$ )  |
| 3     | P2-Lev  | 40                        | 46.35 ( $\pm 1.7$ )               | 50.05 ( $\pm 1.6$ ) | 49.47 ( $\pm 1.7$ ) | 4.17 ( $\pm 1.7$ )  |
| 4     |         | 60                        | 31.58 ( $\pm 1.1$ )               | 41.23 ( $\pm 1.0$ ) | 41.11 ( $\pm 1.1$ ) | 3.70 ( $\pm 1.7$ )  |
| 5     |         | 80                        | 21.76 ( $\pm 1.1$ )               | 31.82 ( $\pm 1.1$ ) | 34.05 ( $\pm 1.1$ ) | 3.35 ( $\pm 1.1$ )  |
| 6     |         | 10                        | 2.29 ( $\pm 0.11$ )               | 2.05 ( $\pm 0.10$ ) | 3.05 ( $\pm 0.11$ ) | 2.9 ( $\pm 0.10$ )  |
| 7     |         | 20                        | 3.29 ( $\pm 0.11$ )               | 3.06 ( $\pm 0.1$ )  | 4.52 ( $\pm 0.15$ ) | 4.23 ( $\pm 0.1$ )  |
| 8     | P4-Lev  | 40                        | 2.41 ( $\pm 0.1$ )                | 2.76 ( $\pm 0.12$ ) | 4.24 ( $\pm 0.17$ ) | 3.29 ( $\pm 0.11$ ) |
| 9     |         | 60                        | 2.12 ( $\pm 0.12$ )               | 2.53 ( $\pm 0.21$ ) | 3.94 ( $\pm 0.16$ ) | 2.94 ( $\pm 0.11$ ) |
| 10    |         | 80                        | 1.89 ( $\pm 0.1$ )                | 2.18 ( $\pm 0.1$ )  | 3.53 ( $\pm 0.15$ ) | 2.47 ( $\pm 0.1$ )  |
| 11    |         | 10                        | 2.91 ( $\pm 0.14$ )               | 2.78 ( $\pm 0.11$ ) | 3.23 ( $\pm 0.10$ ) | 3.12 ( $\pm 0.12$ ) |
| 12    |         | 20                        | 3.29 ( $\pm 0.1$ )                | 2.94 ( $\pm 0.1$ )  | 3.82 ( $\pm 0.1$ )  | 3.58 ( $\pm 0.1$ )  |
| 13    | P6-Lev  | 40                        | 2.71 ( $\pm 0.1$ )                | 2.06 ( $\pm 0.1$ )  | 2.29 ( $\pm 0.1$ )  | 2.82 ( $\pm 0.1$ )  |
| 14    |         | 60                        | 2.24 ( $\pm 0.1$ )                | 1.76 ( $\pm 0.1$ )  | 1.59 ( $\pm 0.1$ )  | 2.35 ( $\pm 0.1$ )  |
| 15    |         | 80                        | 1.24 ( $\pm 0.1$ )                | 1.47 ( $\pm 0.1$ )  | 0.71 ( $\pm 0.1$ )  | 2.00 ( $\pm 0.1$ )  |
| 16    |         | 10                        | 6.23 ( $\pm 0.3$ )                | 2.15 ( $\pm 0.3$ )  | 7.52 ( $\pm 0.4$ )  | 2.1 ( $\pm 0.4$ )   |
| 17    |         | 20                        | 9.35 ( $\pm 0.3$ )                | 3.59 ( $\pm 0.3$ )  | 10.59 ( $\pm 0.4$ ) | 3.82 ( $\pm 0.4$ )  |
| 18    | PA2-Lev | 40                        | 8.53 ( $\pm 0.3$ )                | 3.24 ( $\pm 0.4$ )  | 7.65 ( $\pm 0.3$ )  | 2.88 ( $\pm 0.2$ )  |
| 19    |         | 60                        | 8.00 ( $\pm 0.2$ )                | 2.94 ( $\pm 0.3$ )  | 5.88 ( $\pm 0.2$ )  | 2.18 ( $\pm 0.2$ )  |
| 20    |         | 80                        | 6.94 ( $\pm 0.1$ )                | 2.65 ( $\pm 0.1$ )  | 4.71 ( $\pm 0.1$ )  | 1.65 ( $\pm 0.3$ )  |
| 21    |         | 10                        | 2 ( $\pm 0.3$ )                   | 3.76 ( $\pm 0.3$ )  | 10.12 ( $\pm 0.4$ ) | 1.78 ( $\pm 0.3$ )  |
| 22    |         | 20                        | 2.65 ( $\pm 0.3$ )                | 4.18 ( $\pm 0.3$ )  | 13.64 ( $\pm 0.4$ ) | 2.82 ( $\pm 0.3$ )  |
| 23    | PA4-Lev | 40                        | 2.35 ( $\pm 0.2$ )                | 4.00 ( $\pm 0.3$ )  | 13.05 ( $\pm 0.3$ ) | 2.35 ( $\pm 0.2$ )  |
| 24    |         | 60                        | 1.53 ( $\pm 0.2$ )                | 3.53 ( $\pm 0.2$ )  | 12.17 ( $\pm 0.2$ ) | 2.11 ( $\pm 0.2$ )  |
| 25    |         | 80                        | 1.29 ( $\pm 0.2$ )                | 3.35 ( $\pm 0.2$ )  | 10.05 ( $\pm 0.2$ ) | 1.76 ( $\pm 0.2$ )  |
| 26    |         | 10                        | 1.43 ( $\pm 0.1$ )                | 2.1 ( $\pm 0.1$ )   | 4.12 ( $\pm 0.1$ )  | 1.89 ( $\pm 0.1$ )  |
| 27    |         | 20                        | 1.94 ( $\pm 0.1$ )                | 3.06 ( $\pm 0.1$ )  | 5.29 ( $\pm 0.1$ )  | 2.52 ( $\pm 0.1$ )  |
| 28    | PA6-Lev | 40                        | 1.59 ( $\pm 0.06$ )               | 2.71 ( $\pm 0.1$ )  | 4.82 ( $\pm 0.08$ ) | 2.11 ( $\pm 0.08$ ) |
| 29    |         | 60                        | 1.30 ( $\pm 0.1$ )                | 2.35 ( $\pm 0.06$ ) | 3.59 ( $\pm 0.1$ )  | 1.35 ( $\pm 0.06$ ) |
| 30    |         | 80                        | 1.00 ( $\pm 0.08$ )               | 2.06 ( $\pm 0.1$ )  | 2.76 ( $\pm 0.1$ )  | 0.70 ( $\pm 0.1$ )  |

<sup>a</sup>The solubility value was the average of twice measurements, and the values in the parentheses were the half of the range of replicate results

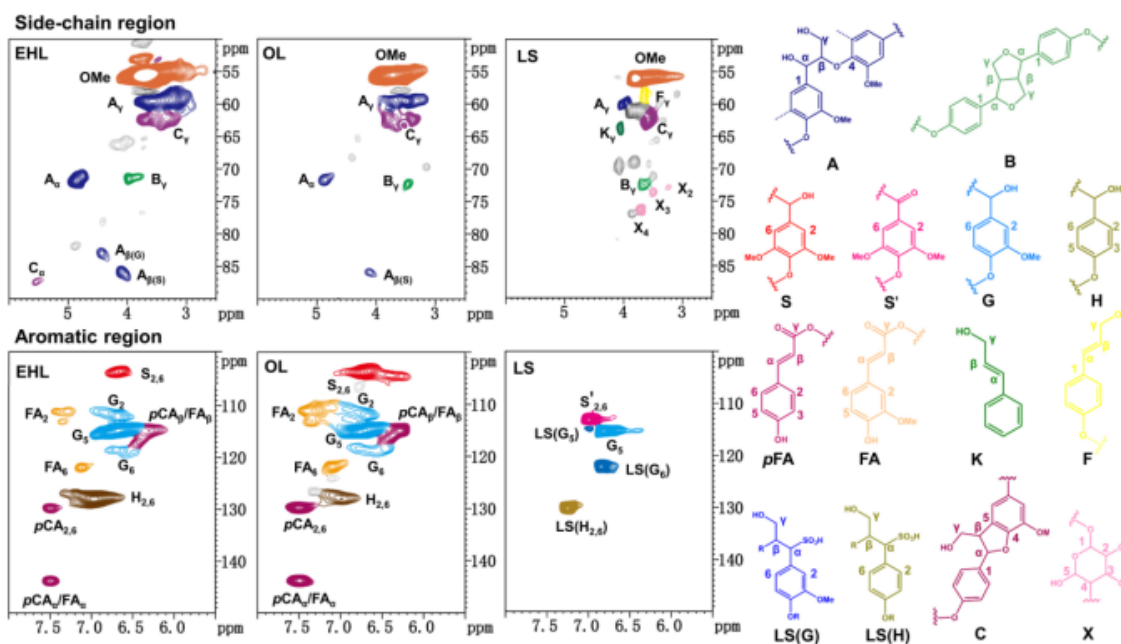

Fig. S3. 2D HSQC NMR spectra of the three lignin samples, including the side chain regions and the aromatic regions. Main substructures of lignin, including side chain linkages and aromatic units.

Table S7. Assignments of  $^{13}\text{C}$ - $^1\text{H}$  correlated signals in the HSQC spectra of three lignin samples.

| Region    | $\delta\text{C}/\delta\text{H}$ (ppm) | Lable                 | Assignment                                                           |
|-----------|---------------------------------------|-----------------------|----------------------------------------------------------------------|
| Aliphatic | 55.7/3.73                             | OMe                   | C-H in methoxyls                                                     |
|           | 71.9/4.86                             | A $\alpha$            | C $\alpha$ -H $\alpha$ in $\beta$ -O-4' substructures (A)            |
|           | 84.2/4.38                             | A $\beta$ (G)         | C $\beta$ -H $\beta$ in $\beta$ -O-4' substructures to G (A)         |
|           | 86.0/4.12                             | A $\beta$ (S)         | C $\beta$ -H $\beta$ in $\beta$ -O-4' substructures to S (A)         |
|           | 59.8/3.38-3.80                        | A $\gamma$            | C $\gamma$ -H $\gamma$ in $\beta$ -O-4' substructures (A)            |
|           | 72.2/3.72-4.15                        | B $\gamma$            | C $\gamma$ -H $\gamma$ in $\beta$ - $\beta$ resinol (B)              |
|           | 87.7/5.54                             | C $\alpha$            | C $\alpha$ -H $\alpha$ in phenylcoumaran (C)                         |
|           | 62.1/3.69                             | C $\gamma$            | C $\gamma$ -H $\gamma$ in phenylcoumaran (C)                         |
|           | 63.8/4.10                             | K $\gamma$            | C $\gamma$ -H $\gamma$ in cinnamyl alcohol (K)                       |
|           | 58.9/3.70                             | F $\gamma$            | C $\gamma$ -H $\gamma$ in p-hydroxycinnamyl alcohol (F)              |
|           | 72.8/3.34                             | X <sub>2</sub>        | C <sub>2</sub> -H <sub>2</sub> in $\beta$ -D-xylopyranoside (X)      |
|           | 73.5/3.65                             | X <sub>3</sub>        | C <sub>3</sub> -H <sub>3</sub> in $\beta$ -D-xylopyranoside (X)      |
|           | 76.3/3.78                             | X <sub>4</sub>        | C <sub>4</sub> -H <sub>4</sub> in $\beta$ -D-xylopyranoside (X)      |
| Aromatic  | 104.0/6.71                            | S <sub>2,6</sub>      | C <sub>2,6</sub> -H <sub>2,6</sub> in syringyl units (S)             |
|           | 104.5/7.34                            | S' <sub>2,6</sub>     | C <sub>2,6</sub> -H <sub>2,6</sub> in oxidized S units (S')          |
|           | 110.9/6.99                            | G <sub>2</sub>        | C <sub>2</sub> -H <sub>2</sub> in guaiacyl units (G)                 |
|           | 115.6/6.78                            | G <sub>5</sub>        | C <sub>5</sub> -H <sub>5</sub> in guaiacyl units (G)                 |
|           | 115.5/6.97                            | LS(G <sub>5</sub> )   | C <sub>5</sub> -H <sub>5</sub> in G units of lignosulfonate (LS)     |
|           | 119.0/6.77                            | G <sub>6</sub>        | C <sub>6</sub> -H <sub>6</sub> in guaiacyl units (G)                 |
|           | 122.0/6.81                            | LS(G <sub>6</sub> )   | C <sub>6</sub> -H <sub>6</sub> in G units of lignosulfonate (LS)     |
|           | 127.5/7.05                            | H <sub>2,6</sub>      | C <sub>2,6</sub> -H <sub>2,6</sub> in p-hydroxyphenyl units (H)      |
|           | 129.8/7.28                            | LS(H <sub>2,6</sub> ) | C <sub>2,6</sub> -H <sub>2,6</sub> in H units of lignosulfonate (LS) |

|            |                           |                                                               |
|------------|---------------------------|---------------------------------------------------------------|
| 110.1/7.29 | FA2                       | C2-H2 in ferulate (FA)                                        |
| 122.2/7.12 | FA6                       | C6-H6 in ferulate (FA)                                        |
| 130.1/7.51 | PCA2,6                    | C2,6-H2,6 in p-coumarate (PCA)                                |
| 144.1/7.50 | PCA $\alpha$ /FA $\alpha$ | C $\alpha$ -H $\alpha$ in p-coumarate (PCA) and ferulate (FA) |
| 115.2/6.30 | PCA $\beta$ /FA $\beta$   | C $\beta$ -H $\beta$ in p-coumarate (PCA) and ferulate (FA)   |

Table S8. The Kamlet-Taft empirical parameters of solvent.

| Entry | Solvent | $\pi^*$ | $\alpha$ | $\beta$ |
|-------|---------|---------|----------|---------|
| 1     | P2-Lev  | 0.705   | 0.941    | 0.691   |
| 2     | P4-Lev  | 0.630   | 0.850    | 0.801   |
| 3     | P6-Lev  | 0.598   | 0.810    | 0.864   |
| 4     | PA2-Lev | 0.985   | 1.284    | 0.376   |
| 5     | PA4-Lev | 0.908   | 1.190    | 0.489   |
| 6     | PA6-Lev | 0.576   | 0.784    | -0.201  |
| 7     | DMI     | 0.441   | 0.619    | 0.909   |
| 8     | PC      | 0.476   | 0.661    | 0.949   |
| 9     | NFM     | 0.441   | 0.619    | 1.266   |
| 10    | Cyrene  | 0.498   | 0.688    | 0.872   |

<sup>a</sup>The Kamlet-Taft empirical parameters was the average of twice measurements, and the values in the parentheses were the half of the range of replicate results

Table S9. The Kamlet-Taft empirical parameters of the PC/PDESs.<sup>a</sup>

| Entry | PDES    | PC content (vol%) | $\pi^*$ | $\alpha$ | $\beta$ |
|-------|---------|-------------------|---------|----------|---------|
| 1     |         | 10                | 0.736   | 0.980    | 0.656   |
| 2     |         | 20                | 0.705   | 0.941    | 0.691   |
| 3     | P2-Lev  | 40                | 0.673   | 0.902    | 0.701   |
| 4     |         | 60                | 0.620   | 0.837    | 0.787   |
| 5     |         | 80                | 0.598   | 0.810    | 0.812   |
| 6     |         | 10                | 0.620   | 0.837    | 1.114   |
| 7     |         | 20                | 0.620   | 0.837    | 1.041   |
| 8     | P4-Lev  | 40                | 0.600   | 0.837    | 0.966   |
| 9     |         | 60                | 0.576   | 0.784    | 0.965   |
| 10    |         | 80                | 0.521   | 0.716    | 0.950   |
| 11    |         | 10                | 0.620   | 0.837    | 0.916   |
| 12    |         | 20                | 0.609   | 0.824    | 0.928   |
| 13    | P6-Lev  | 40                | 0.589   | 0.824    | 0.928   |
| 14    |         | 60                | 0.565   | 0.770    | 0.952   |
| 15    |         | 80                | 0.532   | 0.729    | 0.912   |
| 16    |         | 10                | 0.778   | 1.030    | 0.584   |
| 17    | PA2-Lev | 20                | 0.736   | 0.980    | 0.630   |
| 18    |         | 40                | 0.694   | 0.928    | 0.677   |
| 19    |         | 60                | 0.652   | 0.876    | 0.777   |



|    |         |    |       |       |        |
|----|---------|----|-------|-------|--------|
| 20 |         | 80 | 0.587 | 0.797 | 0.824  |
| 21 |         | 10 | 1.425 | 1.822 | -0.067 |
| 22 |         | 20 | 1.417 | 1.812 | -0.058 |
| 23 | PA4-Lev | 40 | 1.401 | 1.792 | -0.040 |
| 24 |         | 60 | 1.392 | 1.782 | -0.082 |
| 25 |         | 80 | 0.554 | 0.757 | 0.861  |
| 26 |         | 10 | 0.609 | 0.824 | 0.851  |
| 27 |         | 20 | 0.598 | 0.810 | 0.864  |
| 28 | PA6-Lev | 40 | 0.598 | 0.810 | 0.889  |
| 29 |         | 60 | 0.576 | 0.784 | 0.888  |
| 30 |         | 80 | 0.554 | 0.757 | 0.887  |

<sup>a</sup>The Kamlet-Taft empirical parameters was the average of twice measurements, and the values in the parentheses were the half of the range of replicate results

Table S10. The Kamlet-Taft empirical parameters of the NFM/PDESs.<sup>a</sup>

| Entry | PDES    | NFM content<br>(vol%) | $\pi^*$ | $\alpha$ | $\beta$ |
|-------|---------|-----------------------|---------|----------|---------|
| 1     |         | 10                    | 0.630   | 0.850    | 0.853   |
| 2     |         | 20                    | 0.640   | 0.824    | 0.877   |
| 3     | P2-Lev  | 40                    | 0.587   | 0.797    | 0.901   |
| 4     |         | 60                    | 0.521   | 0.716    | 1.052   |
| 5     |         | 80                    | 0.499   | 0.702    | 1.140   |
| 6     |         | 10                    | 0.609   | 0.824    | 0.877   |
| 7     |         | 20                    | 0.576   | 0.784    | 0.965   |
| 8     | P4-Lev  | 40                    | 0.543   | 0.743    | 1.052   |
| 9     |         | 60                    | 0.476   | 0.661    | 1.153   |
| 10    |         | 80                    | 0.453   | 0.633    | 1.253   |
| 11    |         | 10                    | 0.587   | 0.797    | 0.850   |
| 12    |         | 20                    | 0.554   | 0.757    | 0.964   |
| 13    | P6-Lev  | 40                    | 0.509   | 0.702    | 1.090   |
| 14    |         | 60                    | 0.464   | 0.647    | 1.116   |
| 15    |         | 80                    | 0.457   | 0.675    | 1.140   |
| 16    |         | 10                    | 0.652   | 0.876    | 0.699   |
| 17    |         | 20                    | 0.609   | 0.824    | 0.800   |
| 18    | PA2-Lev | 40                    | 0.554   | 0.757    | 0.913   |
| 19    |         | 60                    | 0.509   | 0.702    | 1.014   |
| 20    |         | 80                    | 0.498   | 0.688    | 1.128   |
| 21    |         | 10                    | 0.663   | 0.889    | 0.713   |
| 22    |         | 20                    | 0.620   | 0.837    | 0.839   |
| 23    | PA4-Lev | 40                    | 0.521   | 0.716    | 1.027   |
| 24    |         | 60                    | 0.509   | 0.702    | 1.090   |
| 25    |         | 80                    | 0.498   | 0.688    | 1.152   |
| 26    |         | 10                    | 0.587   | 0.797    | 0.850   |
| 27    | PA6-Lev | 20                    | 0.554   | 0.757    | 0.939   |
| 28    |         | 40                    | 0.521   | 0.716    | 1.027   |

|    |    |       |       |       |
|----|----|-------|-------|-------|
| 29 | 60 | 0.487 | 0.675 | 1.090 |
| 30 | 80 | 0.464 | 0.647 | 1.166 |

<sup>a</sup>The Kamlet-Taft empirical parameters was the average of twice measurements, and the values in the parentheses were the half of the range of replicate results

Table S11. The Kamlet-Taft empirical parameters of the DMI/PDESs.<sup>a</sup>

| Entry | PDES    | DMI content (vol%) | $\pi^*$ | $\alpha$ | $\beta$ |
|-------|---------|--------------------|---------|----------|---------|
| 1     |         | 10                 | 0.673   | 0.902    | 0.727   |
| 2     |         | 20                 | 0.630   | 0.850    | 0.775   |
| 3     | P2-Lev  | 40                 | 0.565   | 0.770    | 0.823   |
| 4     |         | 60                 | 0.521   | 0.716    | 0.899   |
| 5     |         | 80                 | 0.441   | 0.619    | 0.935   |
| 6     |         | 10                 | 0.609   | 0.824    | 1.028   |
| 7     |         | 20                 | 0.587   | 0.797    | 0.978   |
| 8     | P4-Lev  | 40                 | 0.554   | 0.757    | 0.913   |
| 9     |         | 60                 | 0.521   | 0.716    | 0.925   |
| 10    |         | 80                 | 0.453   | 0.633    | 0.923   |
| 11    |         | 10                 | 0.554   | 0.757    | 0.964   |
| 12    |         | 20                 | 0.532   | 0.73     | 0.938   |
| 13    | P6-Lev  | 40                 | 0.509   | 0.70     | 0.911   |
| 14    |         | 60                 | 0.464   | 0.65     | 0.936   |
| 15    |         | 80                 | 0.418   | 0.59     | 0.961   |
| 16    |         | 10                 | 0.673   | 0.902    | 0.568   |
| 17    |         | 20                 | 0.652   | 0.876    | 0.565   |
| 18    | PA2-Lev | 40                 | 0.630   | 0.850    | 0.535   |
| 19    |         | 60                 | 0.543   | 0.743    | 0.715   |
| 20    |         | 80                 | 0.441   | 0.619    | 0.909   |
| 21    |         | 10                 | 0.630   | 0.850    | 0.697   |
| 22    |         | 20                 | 0.587   | 0.797    | 0.745   |
| 23    | PA4-Lev | 40                 | 0.532   | 0.729    | 0.834   |
| 24    |         | 60                 | 0.476   | 0.661    | 0.871   |
| 25    |         | 80                 | 0.418   | 0.591    | 0.935   |
| 26    |         | 10                 | 0.576   | 0.784    | 0.836   |
| 27    |         | 20                 | 0.532   | 0.729    | 0.860   |
| 28    | PA6-Lev | 40                 | 0.487   | 0.675    | 0.884   |
| 29    |         | 60                 | 0.441   | 0.619    | 0.935   |
| 30    |         | 80                 | 0.407   | 0.577    | 0.974   |

<sup>a</sup>The Kamlet-Taft empirical parameters was the average of twice measurements, and the values in the parentheses were the half of the range of replicate results

Table S12. The Kamlet-Taft empirical parameters of the Cyrene/PDESs.a

| Entry | PDES    | Cyrene content<br>(vol%) | $\pi^*$ | $\alpha$ | $\beta$ |
|-------|---------|--------------------------|---------|----------|---------|
| 1     |         | 10                       | 0.727   | 0.967    | 0.771   |
| 2     |         | 20                       | 0.694   | 0.928    | 0.755   |
| 3     | P2-Lev  | 40                       | 0.663   | 0.889    | 0.713   |
| 4     |         | 60                       | 0.620   | 0.837    | 0.761   |
| 5     |         | 80                       | 0.587   | 0.797    | 0.824   |
| 6     |         | 10                       | 0.673   | 0.902    | 0.804   |
| 7     |         | 20                       | 0.652   | 0.876    | 0.803   |
| 8     | P4-Lev  | 40                       | 0.630   | 0.850    | 0.827   |
| 9     |         | 60                       | 0.620   | 0.837    | 0.813   |
| 10    |         | 80                       | 0.598   | 0.810    | 0.864   |
| 11    |         | 10                       | 0.587   | 0.797    | 1.003   |
| 12    |         | 20                       | 0.586   | 0.784    | 0.990   |
| 13    | P6-Lev  | 40                       | 0.577   | 0.797    | 0.952   |
| 14    |         | 60                       | 0.567   | 0.797    | 0.927   |
| 15    |         | 80                       | 0.556   | 0.784    | 0.888   |
| 16    |         | 10                       | 0.908   | 1.190    | 0.384   |
| 17    |         | 20                       | 0.878   | 1.141    | 0.429   |
| 18    | PA2-Lev | 40                       | 0.778   | 1.092    | 0.474   |
| 19    |         | 60                       | 0.673   | 1.055    | 0.508   |
| 20    |         | 80                       | 0.576   | 0.837    | 0.735   |
| 21    |         | 10                       | 0.888   | 1.166    | 0.537   |
| 22    |         | 20                       | 0.878   | 1.153    | 0.548   |
| 23    | PA4-Lev | 40                       | 0.778   | 1.030    | 0.661   |
| 24    |         | 60                       | 0.673   | 0.902    | 0.779   |
| 25    |         | 80                       | 0.576   | 0.784    | 0.836   |
| 26    |         | 10                       | 0.576   | 0.784    | 0.939   |
| 27    |         | 20                       | 0.576   | 0.784    | 0.914   |
| 28    | PA6-Lev | 40                       | 0.576   | 0.784    | 0.888   |
| 29    |         | 60                       | 0.565   | 0.770    | 0.875   |
| 30    |         | 80                       | 0.576   | 0.784    | 0.836   |

<sup>a</sup>The Kamlet-Taft empirical parameters was the average of twice measurements, and the values in the parentheses were the half of the range of replicate results

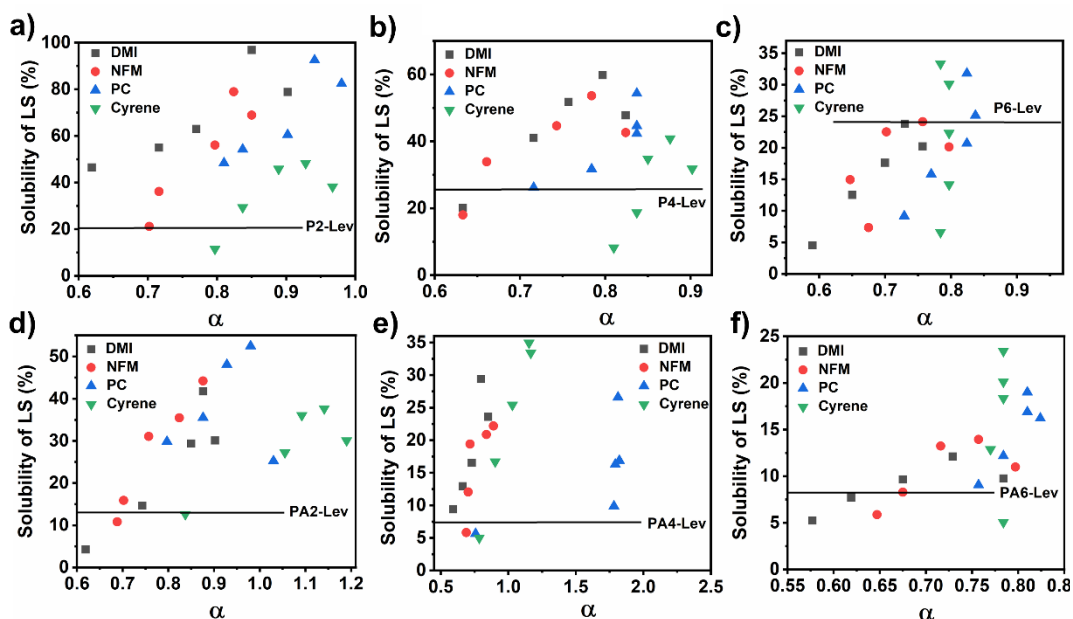

Fig. S4. The correlation between the LS solubility and the  $\alpha$  value of the corresponding solvent (the line represents the solubility of the lignin in PDESs, and the data above the line indicated that lignin was promoted to dissolve by adding co-solvents).

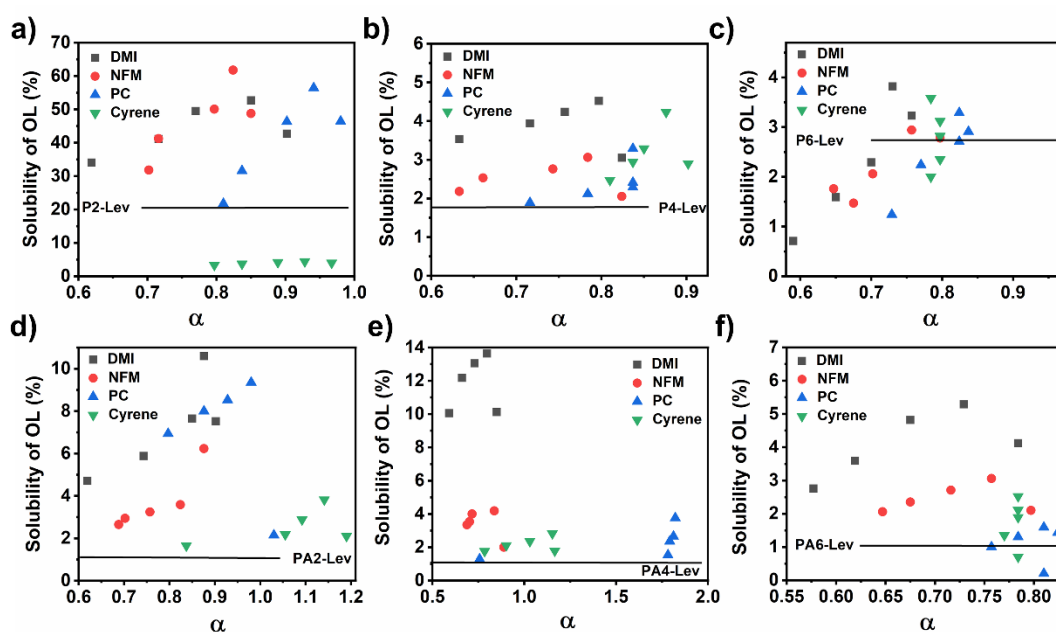

Fig. S5. The correlation between the OL solubility and the  $\alpha$  value of the corresponding solvent (the line represents the solubility of the lignin in PDESs, and the data above the line indicated that lignin was promoted to dissolve by adding co-solvents).

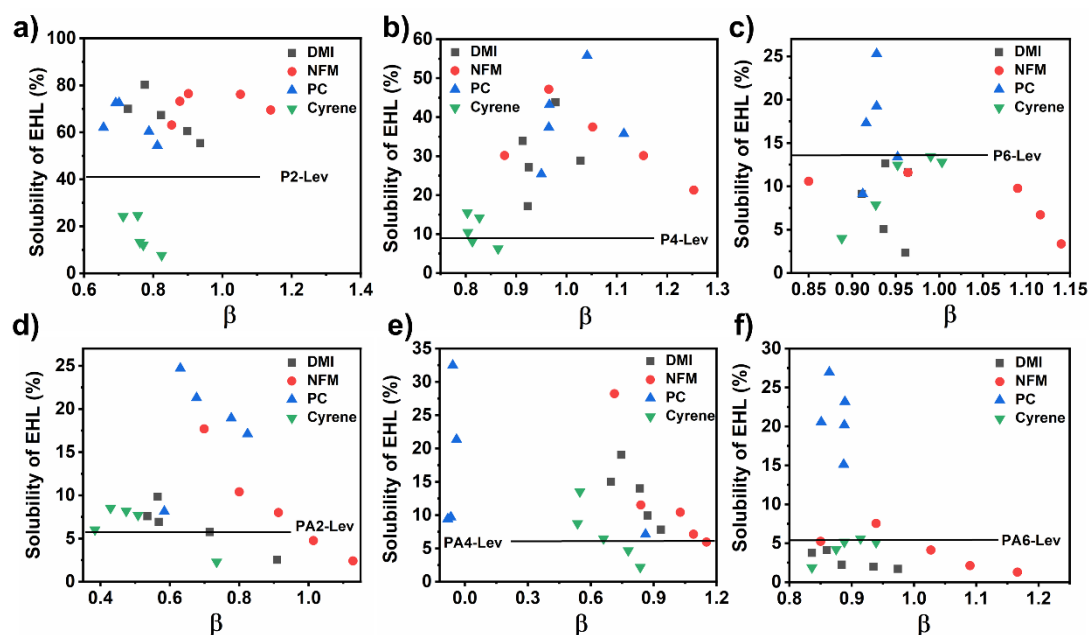

Fig. S6. The correlation between the EHL solubility and the  $\beta$  value of the corresponding solvent (the line represents the solubility of the lignin in PDESs, and the data above the line indicated that lignin was promoted to dissolve by adding co-solvents).

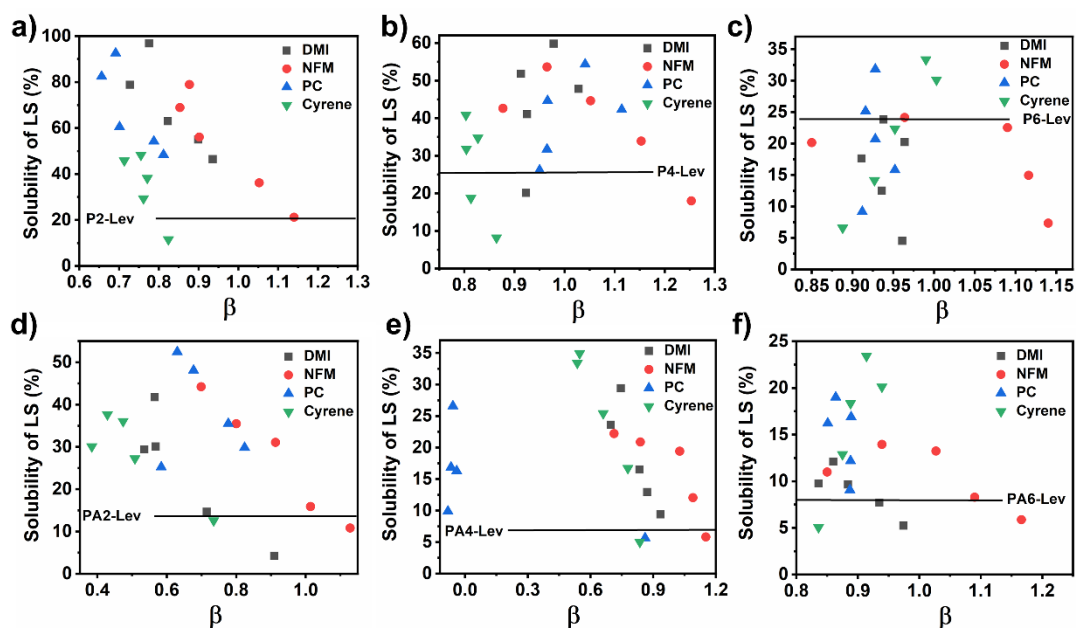

Fig. S7. The correlation between the LS solubility and the  $\beta$  value of the corresponding solvent (the line represents the solubility of the lignin in PDESs, and the data above the line indicated that lignin was promoted to dissolve by adding co-solvents).

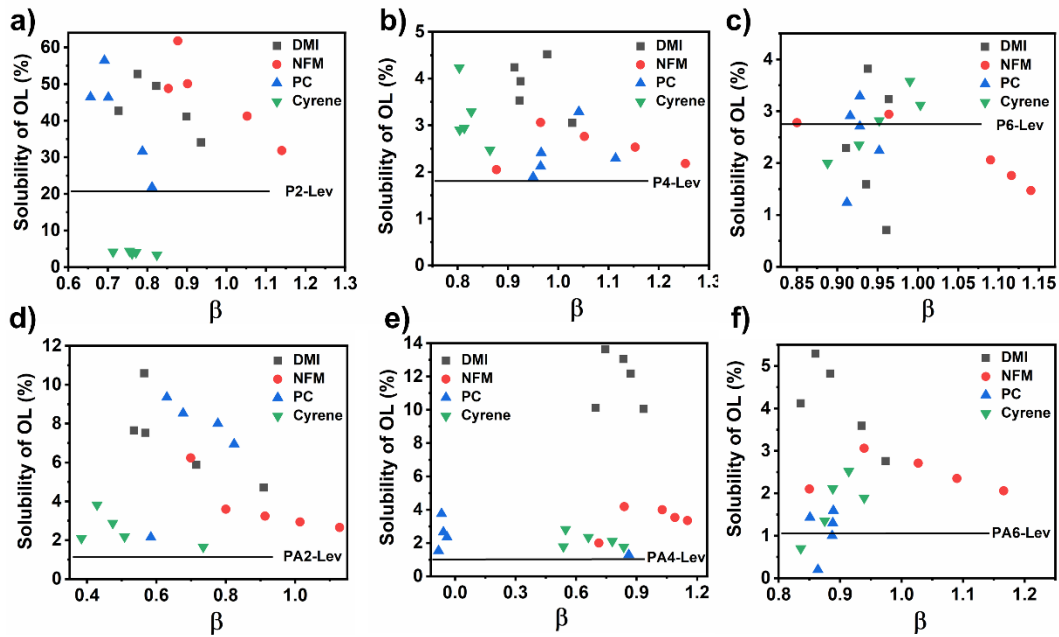

Fig. S8. The correlation between the OL solubility and the  $\beta$  value of the corresponding solvent (the line represents the solubility of the lignin in PDESs, and the data above the line indicated that lignin was promoted to dissolve by adding co-solvents).

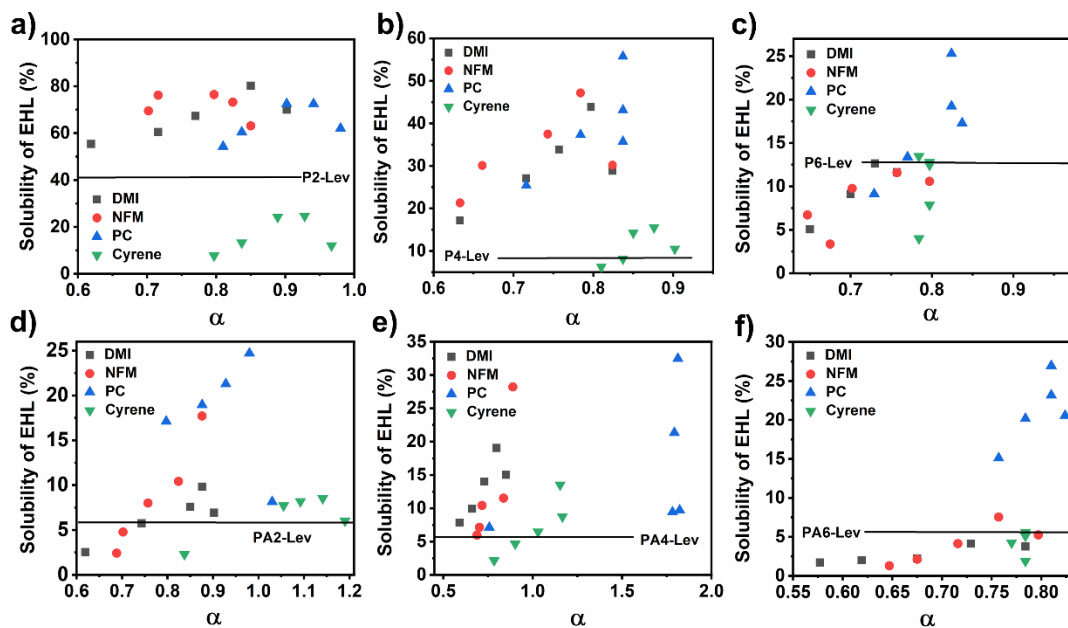

Fig. S9. The correlation between the EHL solubility and the  $\alpha$  value of the corresponding solvent (the line represents the solubility of the lignin in PDESs, and the data above the line indicated that lignin was promoted to dissolve by adding co-solvents).

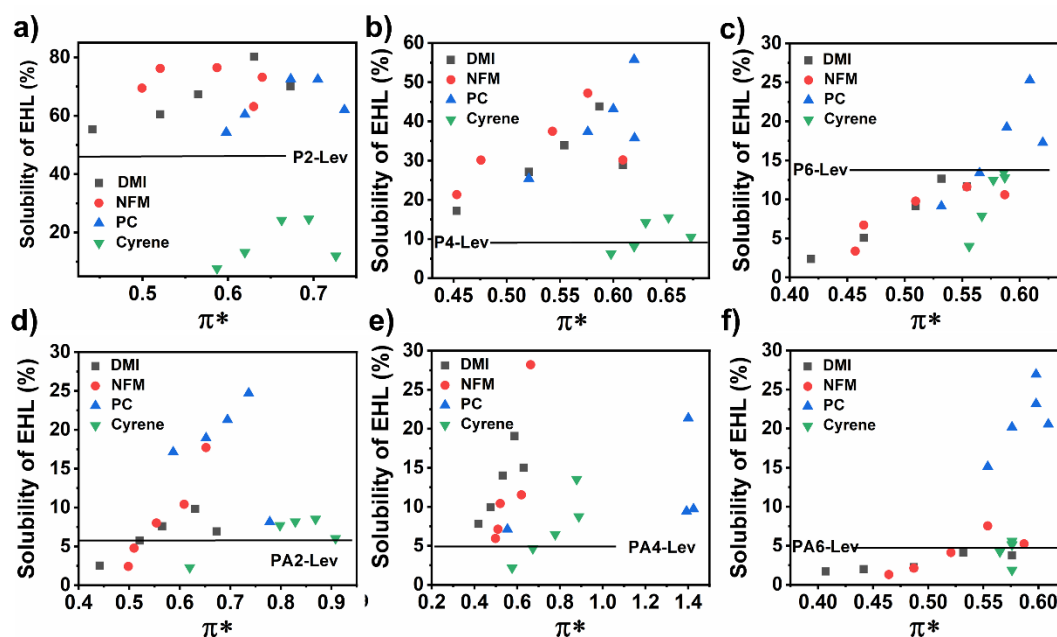

Fig. S10. The correlation between the EHL solubility and the  $\pi^*$  value of the corresponding solvent (the line represents the solubility of the lignin in PDESs, and the data above the line indicated that lignin was promoted to dissolve by adding co-solvents, and the critical value of  $\pi^*$  was 0.441, 0.452, 0.587, 0.520, 0.418 and 0.554 in P2-Lev, P4-Lev, P6-Lev, PA2-Lev, PA4-Lev, and PA6-Lev, respectively).

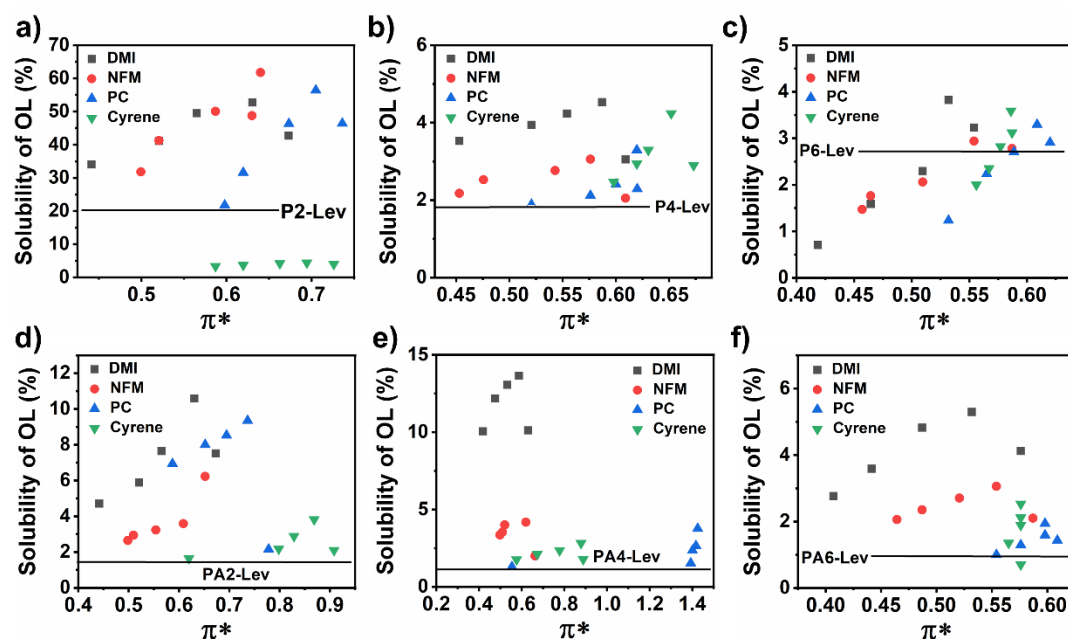

Fig. S11. The correlation between the OL solubility and the  $\pi^*$  value of the corresponding solvent (the line represents the solubility of the lignin in PDESs, and the data above the line indicated that lignin was promoted to dissolve by adding co-solvents, and the critical value of  $\pi^*$  was 0.441, 0.452, 0.531, 0.441, 0.418 and 0.406 in P2-Lev, P4-Lev, P6-Lev, PA2-Lev, PA4-Lev, and PA6-Lev, respectively).

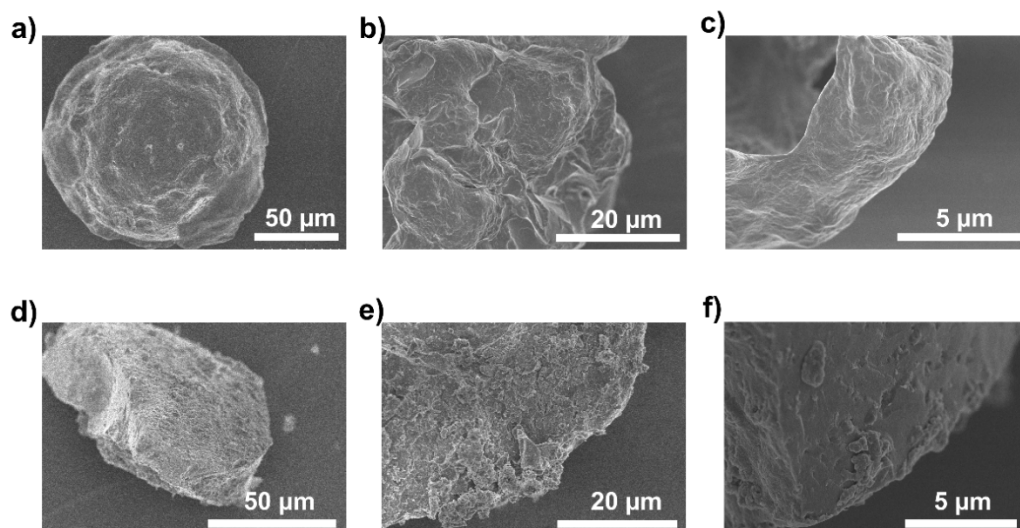

Fig. S12. SEM images of a), b) and c) initial LS and d), e) and f) regenerated LS.

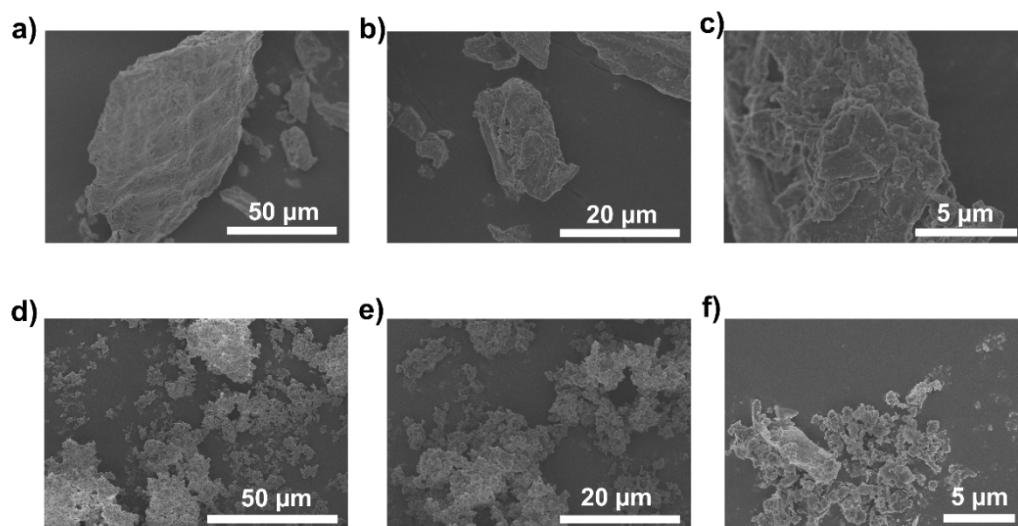

Fig. S13. SEM images of a), b) and c) initial OL and d), e) and f) regenerated OL.

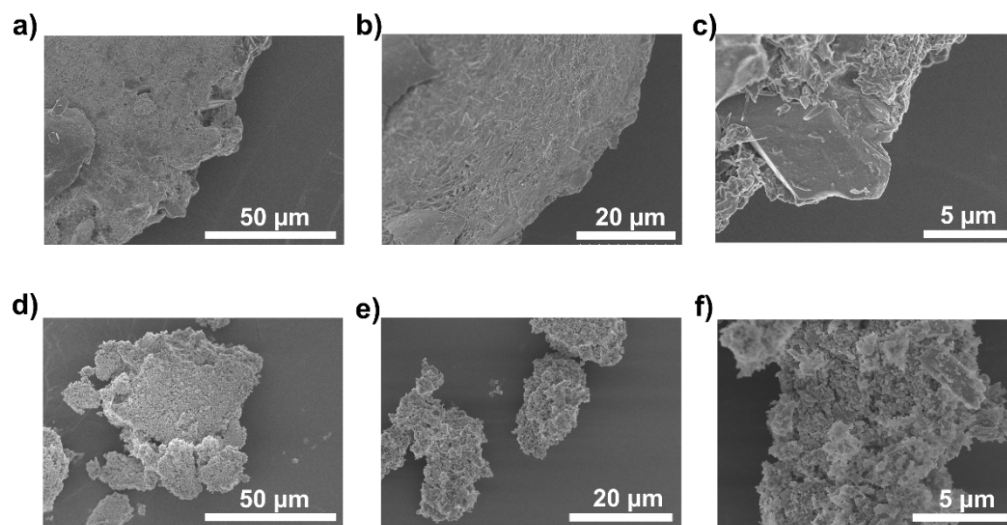

Fig. S14. SEM images of a), b) and c) initial EHL and d), e) and f) regenerated EHL.



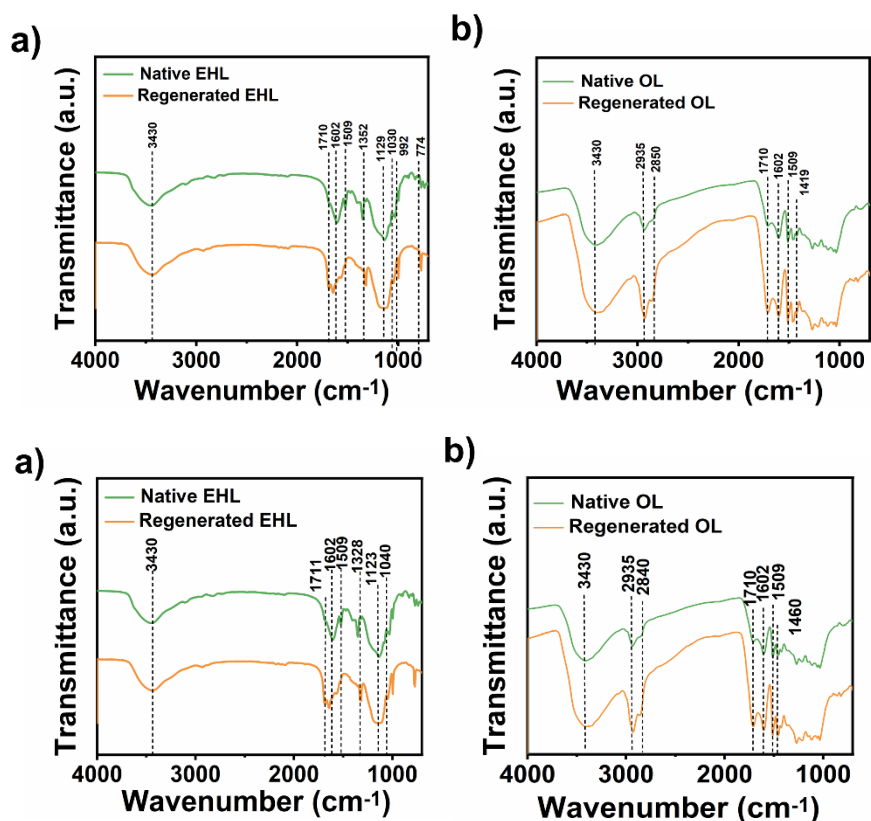

Fig. S15. The FT-IR of native and generated lignins

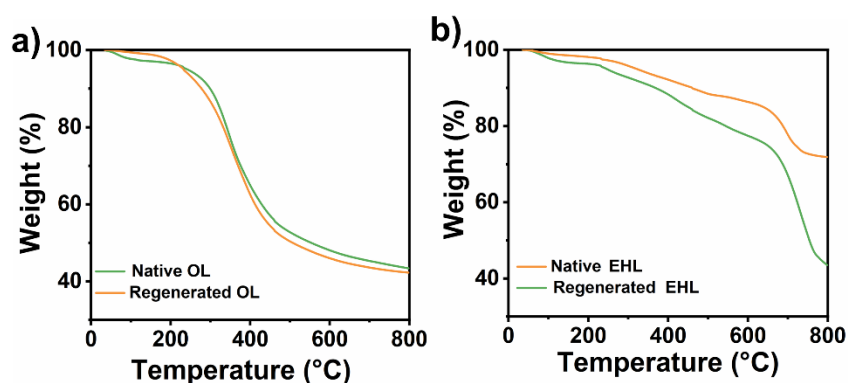

Fig. S16. TGA of initial and regenerated lignin

Table S13. Sugar content and molecular weight of three lignin samples.

| Samples | Sugar (%) |        |           |           |             |              | Purity (%) | Molecular weight (g mol <sup>-1</sup> ) |       | PDI <sup>a</sup> |
|---------|-----------|--------|-----------|-----------|-------------|--------------|------------|-----------------------------------------|-------|------------------|
|         | Glucose   | Xylose | Arabinose | Galactose | Uronic acid | Total sugars |            | $M_w$                                   | $M_n$ |                  |
|         |           |        |           |           |             |              |            |                                         |       |                  |
| OL      | ND        | 0.28   | 0.06      | ND        | 0.02        | 0.36         | 99.64      | 2521                                    | 1240  | 2.03             |
| LS      | 0.32      | 2.53   | 1.95      | 1.04      | 0.05        | 5.89         | 94.11      | 1413                                    | 1258  | 1.12             |

<sup>a</sup> PDI: Polydispersity index.

<sup>b</sup> ND: Not Detected.

Table S14. Element analysis of different lignin

| Sample | Mass fraction (%) |       |      |      |       |
|--------|-------------------|-------|------|------|-------|
|        | N                 | C     | H    | S    | O     |
| EHL    | 0.67              | 59.27 | 5.74 | 0.16 | 20.00 |
| LS     | 0.66              | 31.26 | 3.97 | 6.40 | 24.62 |
| OL     | 0.38              | 62.00 | 6.19 | 0.04 | 20.30 |
